# Supplementary material for: Licochalcone A activation of glycolysis pathway has an anti-aging effect on human adipose stem cells
Source: Aging (Albany NY). 2021 Dec 3;13(23):25180–94. doi: 10.18632/aging.203734 (PMC8714166; doi:10.18632/aging.203734)
Supplement: Supplementary Figures [file aging-13-203734-s001.pdf]

## SUPPLEMENTARY FIGURES

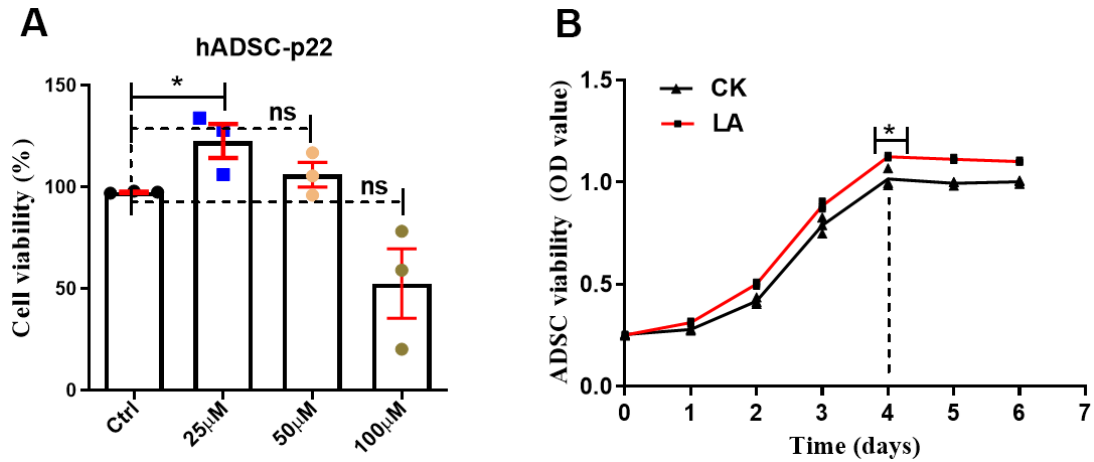

**Supplementary Figure 1. Cell viability assay and survival curve analysis to monitor the effect of LA on aged hADSC. (A)** Cell viability assay. **(B)** Survival curve. The data are presented as mean  $\pm$  SD of three independent experiments. \*  $p < 0.05$ , \*\*  $p < 0.01$  compared to untreated cells.

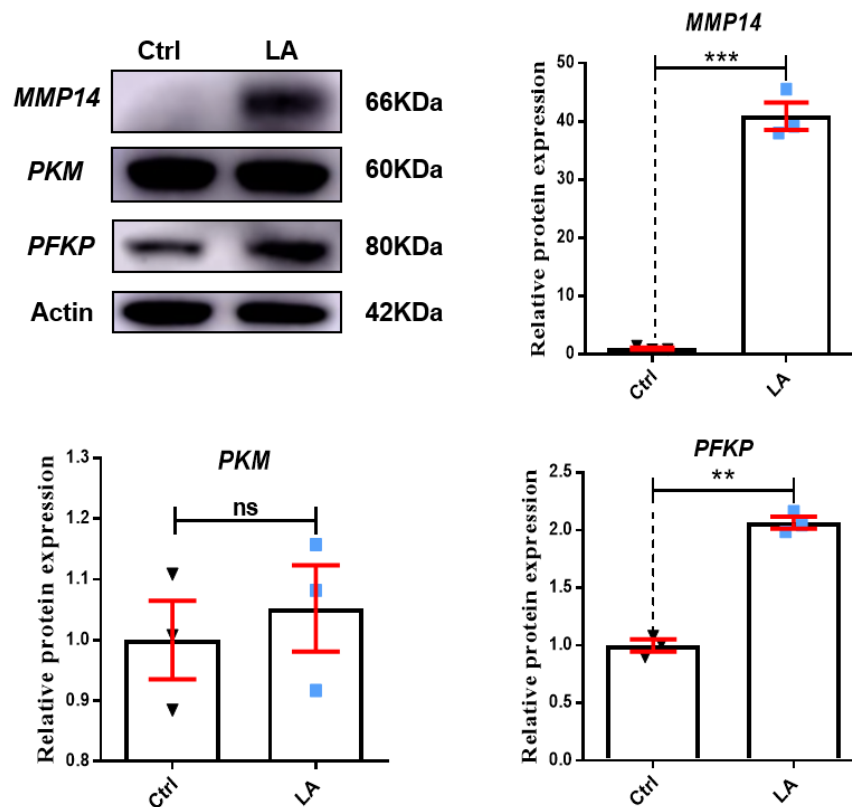

**Supplementary Figure 2. Western blot analysis of glycolysis/gluconeogenesis signaling pathway related proteins in hADSCs treated as indicated.** Data are presented as the mean  $\pm$  SD of three independent experiments. \*  $p < 0.05$ , \*\*  $p < 0.01$ , \*\*\*  $p < 0.001$  compared with untreated cells.

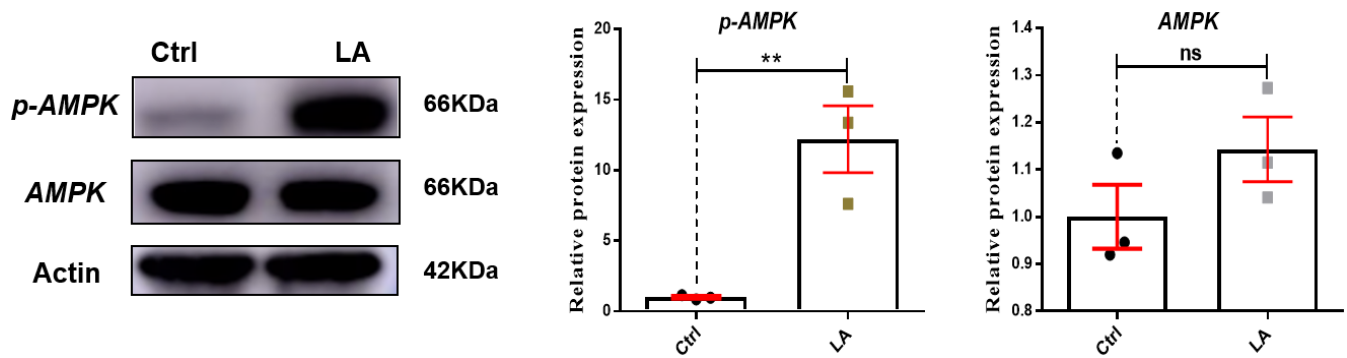

**Supplementary Figure 3. Western blot analysis of AMPK protein in hADSCs treated as indicated (LA 24 h treatment).** Data are presented as the mean  $\pm$  SD of three independent experiments. \* $p < 0.05$ , \*\* $p < 0.01$ , \*\*\* $p < 0.001$  compared with untreated cells.

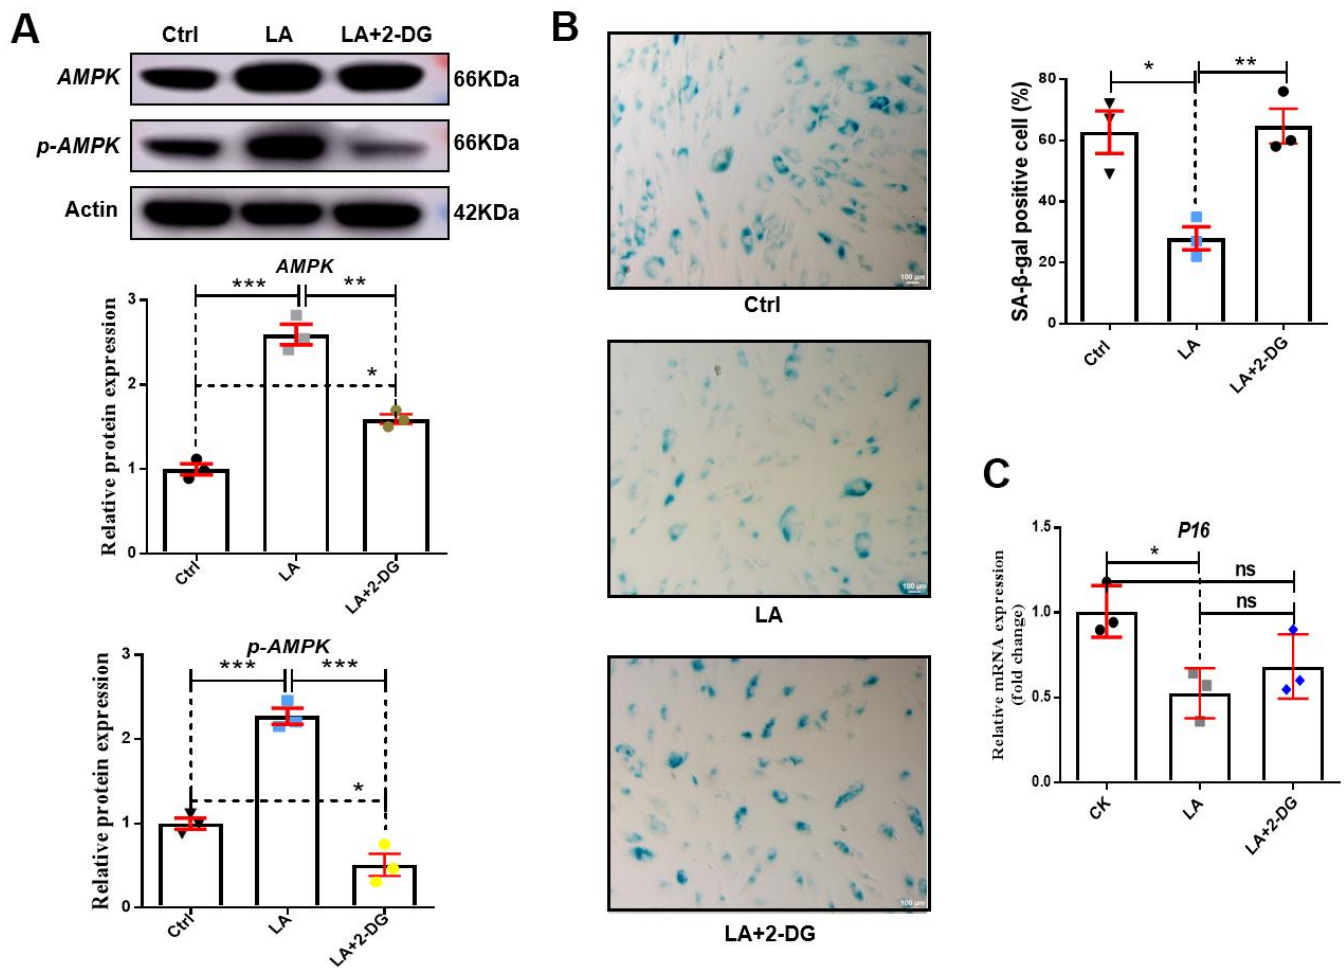

**Supplementary Figure 4. Influences of LA on senescence of hADSCs can be reversed by glycolysis inhibitor 2-DG.** (A) Western blot analysis of AMPK protein in hADSCs treated as indicated (LA treatment 80 h). (B) SA-β-gal staining of hADSCs (Scale bar: 100 μm) (LA treatment 48 h). The relative intensity of ROS was detected by a microplate reader. (C) qRT-PCR of mRNA levels of p16 gene (LA treatment 48 h). Data are presented as the mean  $\pm$  SD of three independent experiments. \* $p < 0.05$ , \*\* $p < 0.01$ , \*\*\* $p < 0.001$  compared with control cells.
